# Supplementary material
Source: PubMed Central journal article supplement (PMC3082296)

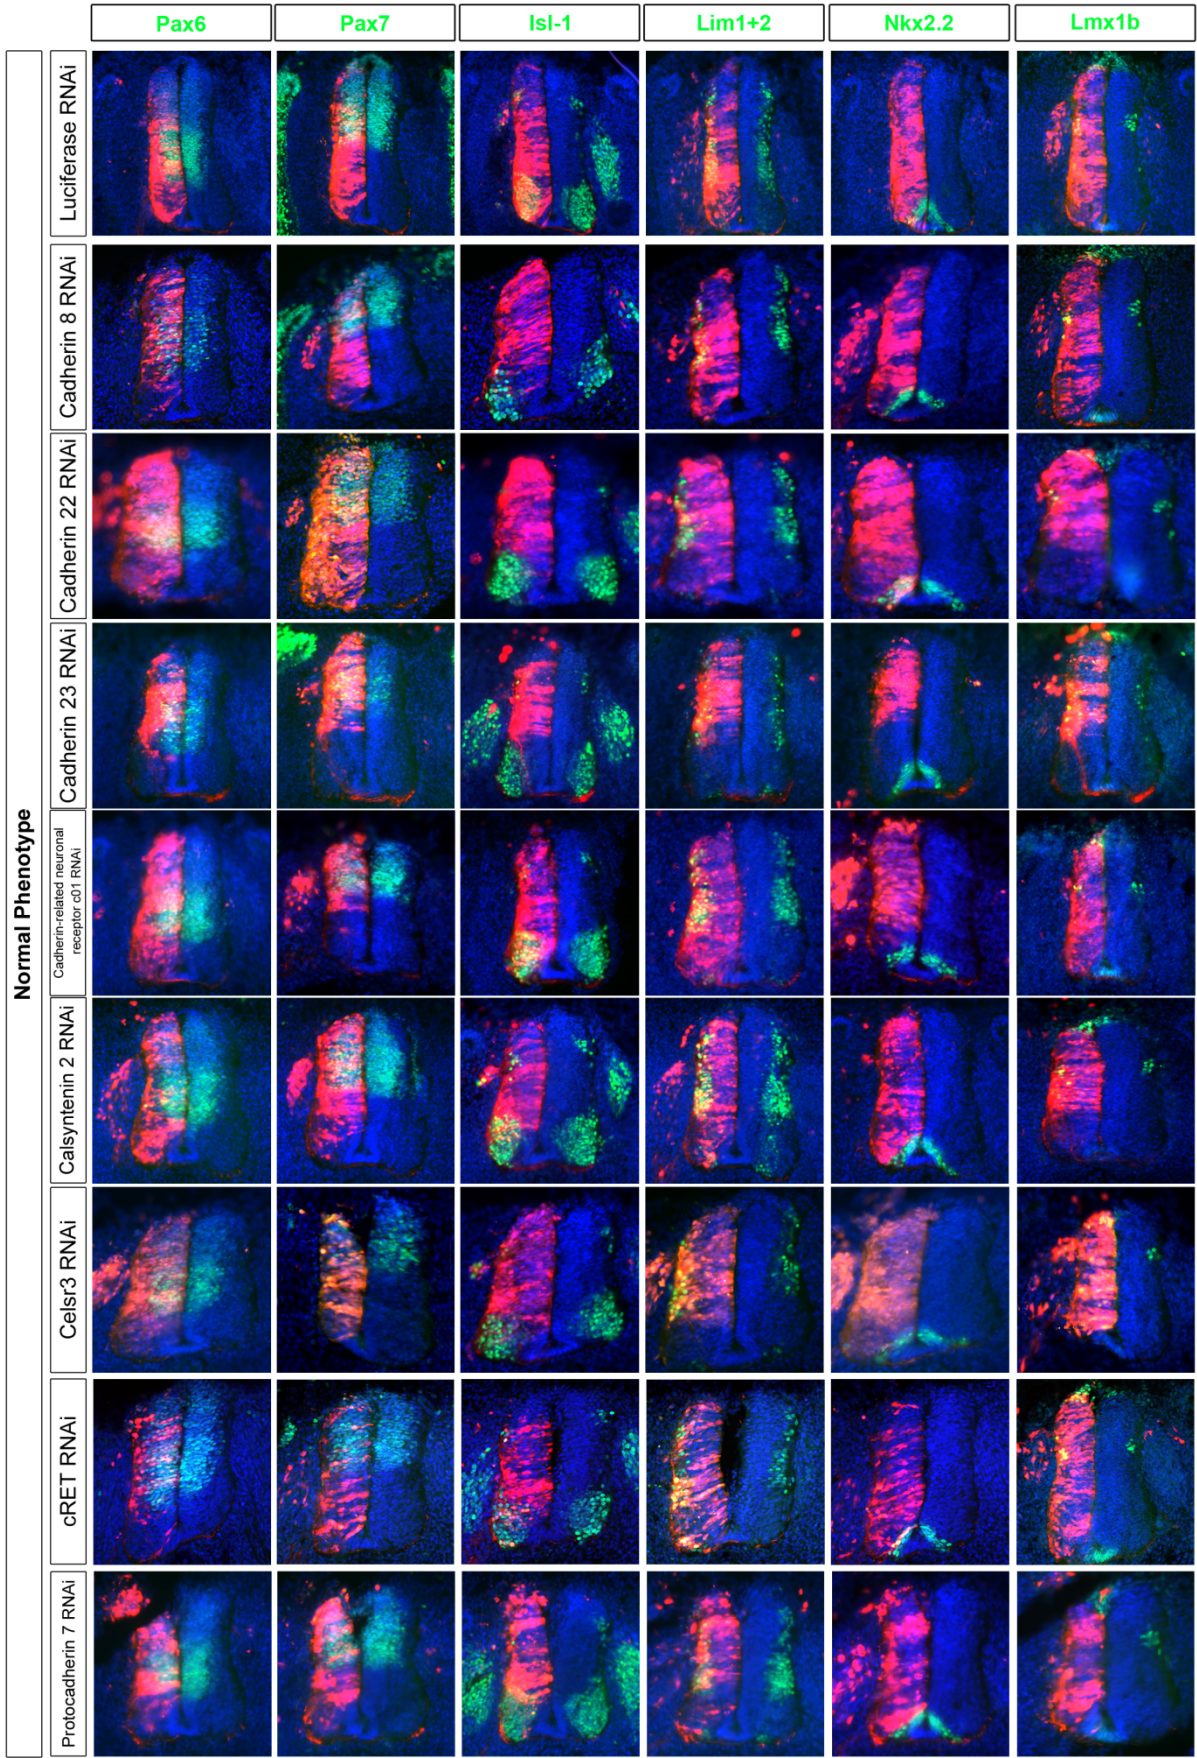



**Normal Phenotype**

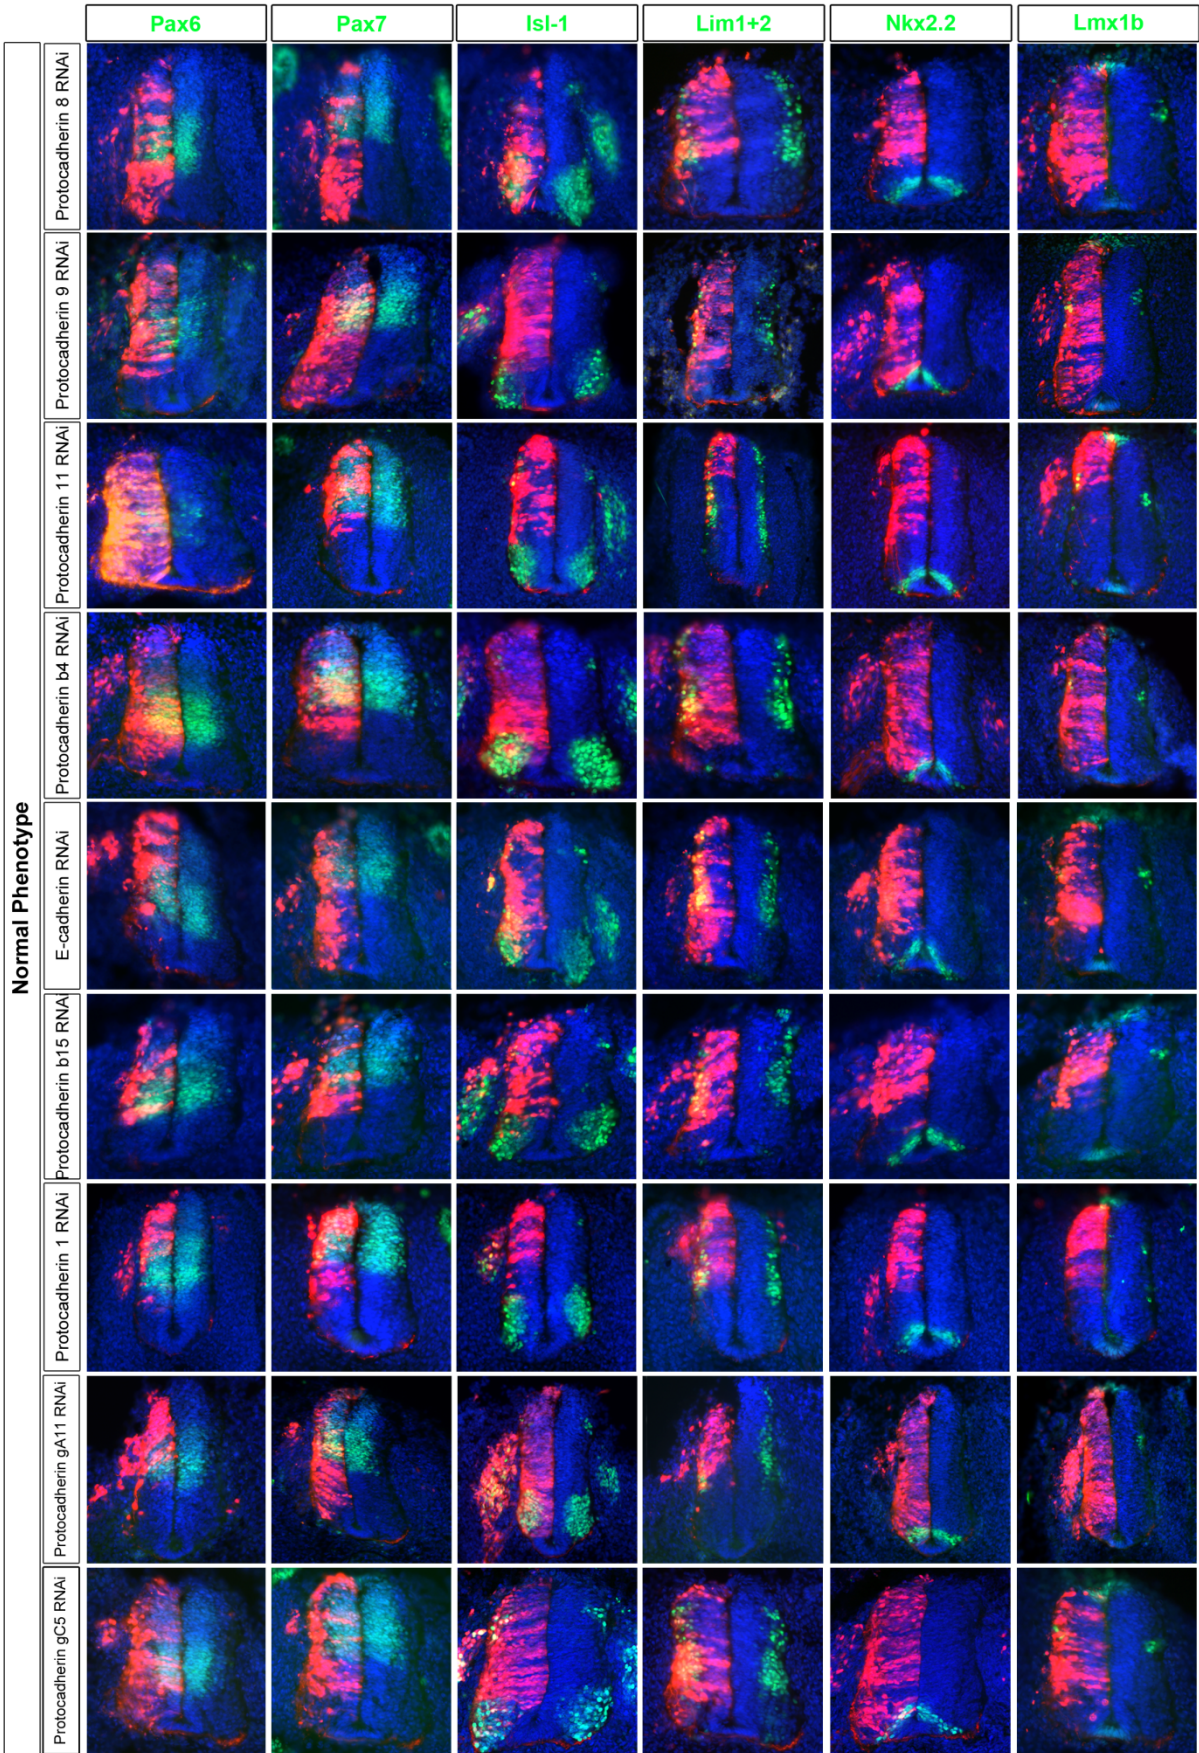



|                  |                           | Pax6                    | Pax7              | Isl-1 | Lim1+2 | Nkx2.2 | Lmx1b |  |  |
|------------------|---------------------------|-------------------------|-------------------|-------|--------|--------|-------|--|--|
| Normal Phenotype | Protocadherin LKC RNAi    |                         |                   |       |        |        |       |  |  |
|                  | Differentiation Phenotype | Brain Cadherin RNAi     |                   |       |        |        |       |  |  |
|                  |                           | Cadherin 18 RNAi        |                   |       |        |        |       |  |  |
|                  |                           | Fat2 RNAi               |                   |       |        |        |       |  |  |
|                  |                           | VE-cadherin RNAi        |                   |       |        |        |       |  |  |
|                  |                           | Decrease in Cell Number | Cadherin 6B RNAi  |       |        |        |       |  |  |
|                  |                           |                         | Cadherin 13 RNAi  |       |        |        |       |  |  |
|                  |                           |                         | Calsyntenin1 RNAi |       |        |        |       |  |  |



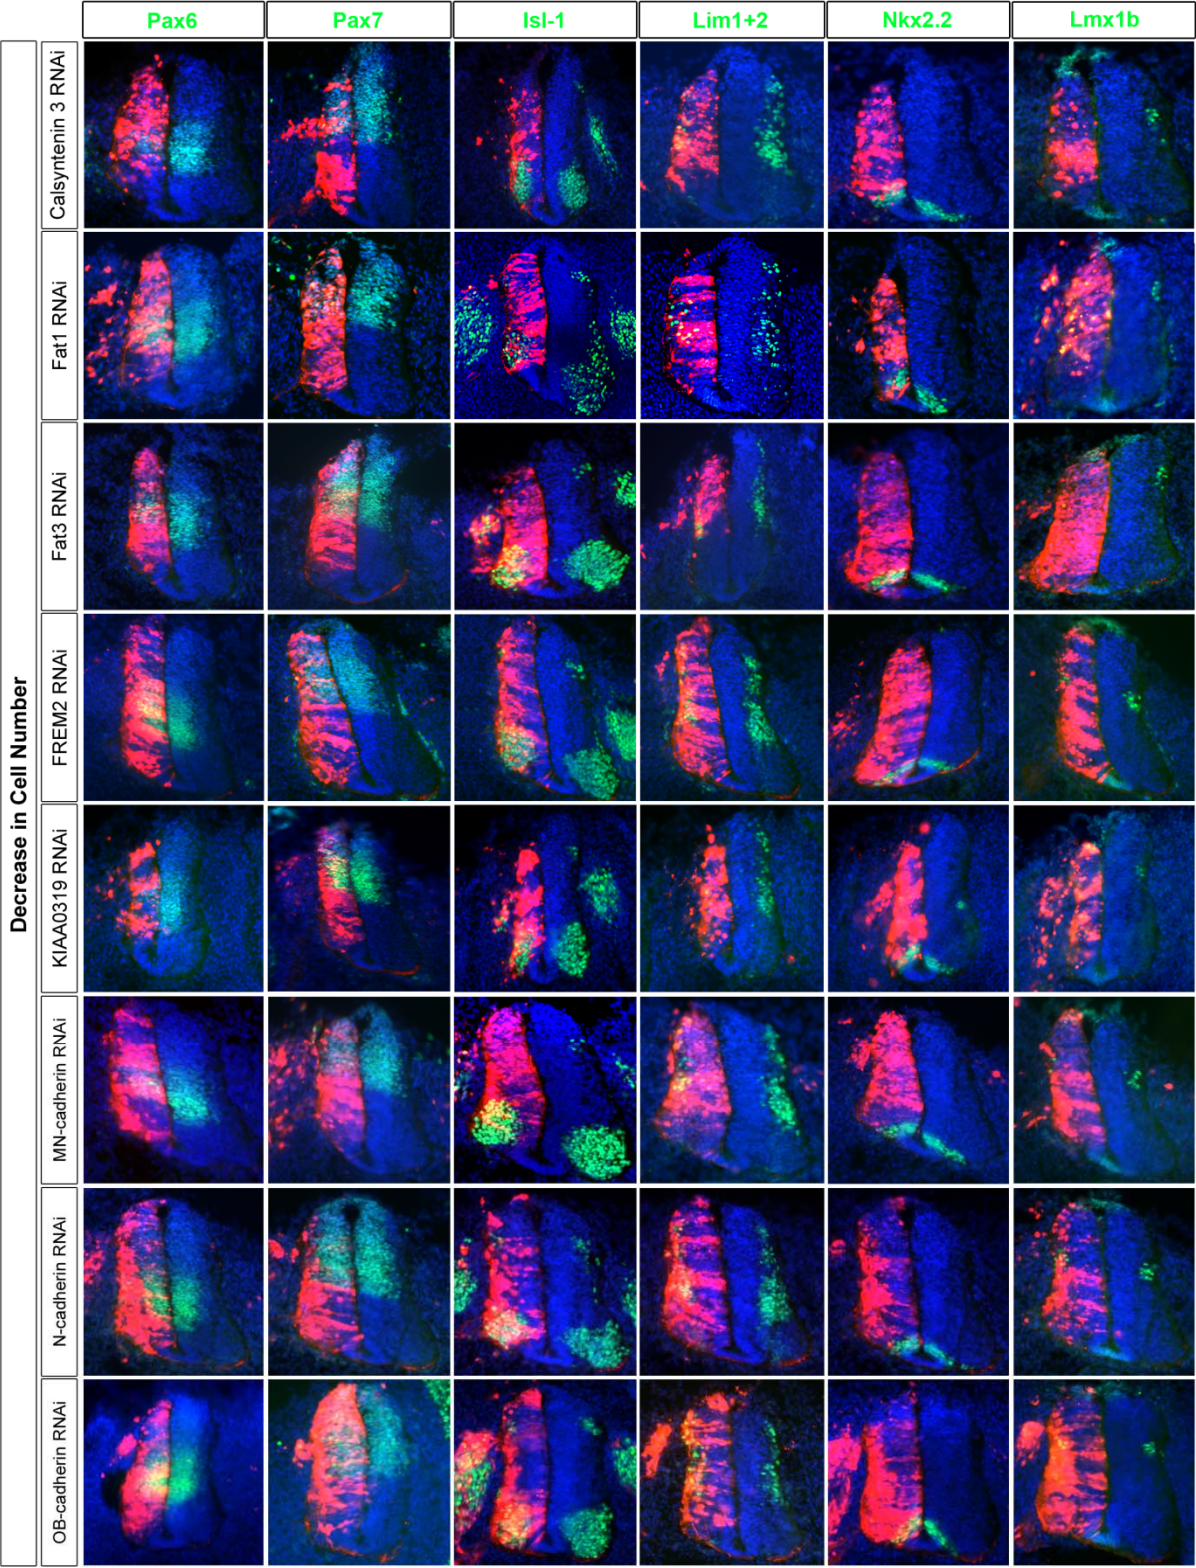



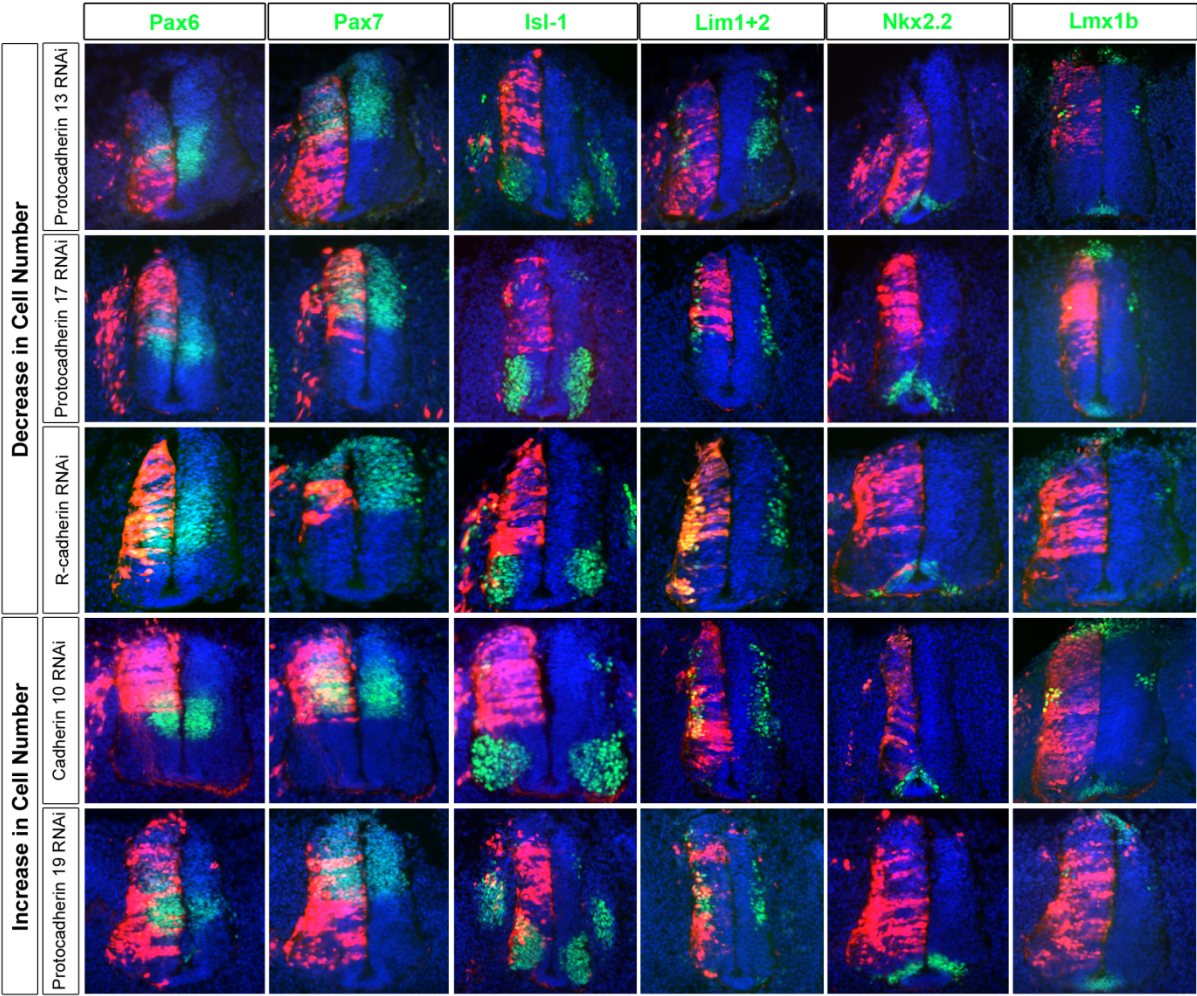

Supplement: supp_138.10.1893_DEV064204FigS1.pdf [file supp_138.10.1893_DEV064204FigS1.pdf]
