# Supplementary material
Source: PubMed Central journal article supplement (PMC3082296)
Supplement: supp_138.10.1893_DEV064204TableS1.pdf [file supp_138.10.1893_DEV064204TableS1.pdf]

**Table S1. Summary of RNAi knockdown of all cadherin containing genes identified in stage 22 spinal cord**

| Target ID | Description                            | Cadherin Type       | Ensembl gene ID    | Phenotype observed*     |
|-----------|----------------------------------------|---------------------|--------------------|-------------------------|
| pECK0     | Protocadherin10                        | Protocadherin       | ENSGALG00000000746 | NT patterning defects   |
| pECK1     | cRET                                   | Receptor Tyr kinase | ENSGALG00000002555 | No phenotype            |
| pECK2     | Calsyntenin1                           | Protocadherin       | ENSGALG00000002606 | Decrease in cell number |
| pECK3     | Protocadherin gamma C5                 | Protocadherin       | ENSGALG00000002657 | No phenotype            |
| pECK4     | Cadherin4, R-cadherin                  | Classical Type I    | ENSGALG00000005102 | Decrease in cell number |
| pECK5     | Cadherin5, VE-cadherin                 | Classical Type I    | ENSGALG00000005272 | Differentiation defect  |
| pECK6     | Cadherin 11, OB-cadherin               | Classical Type I    | ENSGALG00000005278 | Decrease in cell number |
| pECK7     | Celsr3, Flamingo1 homologue            | Flamingo orthologue | ENSGALG00000005730 | No phenotype            |
| pECK8     | FatJ protocadherin                     | Fat protocadherin   | ENSGALG00000011823 | Differentiation defect  |
| pECK9     | Cadherin20, MN-cadherin                | Classical Type II   | ENSGALG00000012906 | Decrease in cell number |
| pECK10    | Fat1 protocadherin                     | Fat protocadherin   | ENSGALG00000013579 | Decrease in cell number |
| pECK12    | Calsyntenin3                           | Protocadherin       | ENSGALG00000014674 | Decrease in cell number |
| pECK13    | Cadherin2, N-cadherin                  | Classical Type I    | ENSGALG00000015132 | Decrease in cell number |
| pECK14    | Protocadherin8 (Arcadlin)              | Protocadherin       | ENSGALG00000016944 | No phenotype            |
| pECK15    | Protocadherin17                        | Protocadherin       | ENSGALG00000016941 | Decrease in cell number |
| pECK38    | Cadherin1, E-Cadherin                  | Classical Type I    | ENSGALG0000000608  | No phenotype            |
| pECK39    | Cadherin-related neuronal receptor c01 | Protocadherin       | ENSGALG00000000760 | No phenotype            |
| pECK40    | Protocadherin beta 15                  | Protocadherin       | ENSGALG00000001009 | No phenotype            |
| pECK41    | Protocadherin1                         | Protocadherin       | ENSGALG00000002553 | No phenotype            |
| pECK42    | Protocadherin-LKC gene product         | Protocadherin       | ENSGALG00000003285 | No phenotype            |
| pECK43    | Fat2 protocadherin                     | Fat protocadherin   | ENSGALG00000004320 | Differentiation defect  |
| pECK44    | Cadherin23, Otocadherin                | Protocadherin       | ENSGALG00000004653 | No phenotype            |
| pECK45    | Calsyntenin2                           | Protocadherin       | ENSGALG00000005310 | No phenotype            |
| pECK46    | Cadherin8                              | Classical Type II   | ENSGALG00000005319 | No phenotype            |
| pECK47    | Protocadherin beta 4                   | Protocadherin       | ENSGALG00000005427 | No phenotype            |
| pECK48    | Cadherin13, Truncated-cadherin         | Classical Type II   | ENSGALG00000005483 | Decrease in cell number |
| pECK49    | Protocadherin19                        | Protocadherin       | ENSGALG00000006822 | Increase in cell number |
| pECK50    | Protocadherin11                        | Protocadherin       | ENSGALG00000006851 | No phenotype            |
| pECK51    | Cadherin22                             | Classical Type II   | ENSGALG00000007211 | No phenotype            |
| pECK53    | Unknown gene KIAA0319                  | Unknown             | ENSGALG00000012660 | Decrease in cell number |

|                                                                                                                                                                                                                                                                                                                                                                                                                                                                                                                                                                                                                                                                          |                                     |                      |                    |                         |
|--------------------------------------------------------------------------------------------------------------------------------------------------------------------------------------------------------------------------------------------------------------------------------------------------------------------------------------------------------------------------------------------------------------------------------------------------------------------------------------------------------------------------------------------------------------------------------------------------------------------------------------------------------------------------|-------------------------------------|----------------------|--------------------|-------------------------|
| pECK54                                                                                                                                                                                                                                                                                                                                                                                                                                                                                                                                                                                                                                                                   | Cadherin6B                          | Classical Type II    | ENSGALG00000012917 | Decrease in cell number |
| pECK55                                                                                                                                                                                                                                                                                                                                                                                                                                                                                                                                                                                                                                                                   | Cadherin10, T2 cadherin             | Classical Type II    | ENSGALG00000012927 | Increase in cell number |
| pECK56                                                                                                                                                                                                                                                                                                                                                                                                                                                                                                                                                                                                                                                                   | Cadherin12, Brain cadherin          | Classical Type II    | ENSGALG00000012941 | Differentiation defect  |
| pECK57                                                                                                                                                                                                                                                                                                                                                                                                                                                                                                                                                                                                                                                                   | Cadherin18 (Cdh14)                  | Classical Type II    | ENSGALG00000012942 | Differentiation defect  |
| pECK58                                                                                                                                                                                                                                                                                                                                                                                                                                                                                                                                                                                                                                                                   | Protocadherin7                      | Protocadherin        | ENSGALG00000014349 | No phenotype            |
| pECK59                                                                                                                                                                                                                                                                                                                                                                                                                                                                                                                                                                                                                                                                   | Protocadherin9                      | Protocadherin        | ENSGALG00000016908 | No phenotype            |
| pECK60                                                                                                                                                                                                                                                                                                                                                                                                                                                                                                                                                                                                                                                                   | Protocadherin13                     | Protocadherin        | ENSGALG00000016934 | Decrease in cell number |
| pECK61                                                                                                                                                                                                                                                                                                                                                                                                                                                                                                                                                                                                                                                                   | FRAS1-related ECM protein 2 (FREM2) | Extracellular Matrix | ENSGALG00000017041 | Decrease in cell number |
| pECK62                                                                                                                                                                                                                                                                                                                                                                                                                                                                                                                                                                                                                                                                   | Fat3 protocadherin                  | Fat protocadherin    | ENSGALG00000017229 | Decrease in cell number |
| pECK64                                                                                                                                                                                                                                                                                                                                                                                                                                                                                                                                                                                                                                                                   | Protocadherin gamma A11             | Protocadherin        | ENSGALG00000021472 | No phenotype            |
| <p>*Phenotype observed following RNAi-mediated knockdown: 'NT patterning defects', alteration in the expression pattern of Pax6, Pax7, Islet1, Lim1/Lim2 Nkx2.2 or Lmx1b; 'Decrease in cell number', reduction in total number of cells on the electroporated side of the NT and concomitant reduction in size of expression domain of all markers analysed; 'Increase in cell number', increase in total number of cells on the electroporated side of the NT; 'Differentiation defect', increased differentiation of neuronal progenitors evident by an accumulation of electroporated cells in the mantle zone of the NT where differentiating cells are located.</p> |                                     |                      |                    |                         |
