# Supplementary material
Source: PubMed Central journal article supplement (PMC3082296)
Supplement: supp_138.10.1893_DEV064204TableS2.pdf [file supp_138.10.1893_DEV064204TableS2.pdf]

| Table S2. Cadherin RNAi target sequence |                             |                    |                    |              |                        |          |
|-----------------------------------------|-----------------------------|--------------------|--------------------|--------------|------------------------|----------|
| RNAi vector ID                          | Description                 | Ens Gene ID        | Ens Trans ID       | Trans length | Target seq             | Location |
| pECK0A                                  | Protocadherin10             | ENSGALG00000000746 | ENSGALT00000001080 | 2862         | ACGACAATATTCCTGCCTTGA  | 719      |
| pECK0B                                  |                             |                    |                    |              | GCGTCTACGTGATGGAGAACAA | 1394     |
| pECK0C                                  |                             |                    |                    |              | TCTTTGTGAACGAGCGGATAGA | 263      |
| pECK1A                                  | cRET                        | ENSGALG00000002555 | ENSGALT00000041122 | 3333         | GGTAGAATTTACATGCATTTA  | 3182     |
| pECK1B                                  |                             |                    |                    |              | CCTTTCACATCAAGGAGAATAA | 507      |
| pECK1C                                  |                             |                    |                    |              | AGGCAGCTTTGCTTCACAGAAA | 476      |
| pECK2A                                  | Calsyntenin1                | ENSGALG00000002606 | ENSGALT00000004104 | 2925         | GCGACCAAGTCTTTGAGTTTAA | 986      |
| pECK2B                                  |                             |                    |                    |              | CAGTTGAAGTAAACCAATCA   | 815      |
| pECK2C                                  |                             |                    |                    |              | GGAGACATGTGATGAACCAATA | 777      |
| pECK3A                                  | Protocadherin gamma C3      | ENSGALG00000021472 | ENSGALT00000004187 | 3379         | AGAGTGATTTCTCTTTGTAAA  | 2451     |
| pECK3B                                  |                             |                    |                    |              | CCATGATCCTGGCCTCGGCAAA | 2709     |
| pECK3C                                  |                             |                    |                    |              | TTAACTCTTTCAGACCTATCA  | 622      |
| pECK4A                                  | Cadherin4, R-cadherin       | ENSGALG00000005102 | ENSGALT00000008180 | 2742         | AGATCTACCTAATCGACATCAA | 1952     |
| pECK4B                                  |                             |                    |                    |              | CCTGCAAAGTGGCTGAACATTA | 1795     |
| pECK4C                                  |                             |                    |                    |              | TGCAGTTGATAGCTTTCTCTTA | 1090     |
| pECK5A                                  | Cadherin5, VE-cadherin      | ENSGALG00000005272 | ENSGALT00000008459 | 2361         | TACATGAGTTACTGCAGATAAA | 3065     |
| pECK5B                                  |                             |                    |                    |              | AGGAGAAGTTGGCCGAGTTAAA | 843      |
| pECK5C                                  |                             |                    |                    |              | TGGAAATGATGATCGAGGTTAA | 2123     |
| pECK6A                                  | Cadherin 11, OB-cadherin    | ENSGALG00000005278 | ENSGALT00000008465 | 5406         | GGAAGAGTATCACGTTGTAATA | 1310     |
| pECK6B                                  |                             |                    |                    |              | AGACTGTTCTACCTGACAATTA | 4325     |
| pECK6C                                  |                             |                    |                    |              | GAATGACGTTTCAGCTCTATAA | 4855     |
| pECK7A                                  | Celsr3, Flamingo1 homologue | ENSGALG00000005730 | ENSGALT00000009205 | 8958         | CGGCCTTGATAGACCTGGATTA | 2417     |
| pECK7B                                  |                             |                    |                    |              | TGTATGCAATTCTCCACATA   | 6321     |
| pECK7C                                  |                             |                    |                    |              | TGATGGAGCTTCTGCGGACTA  | 6078     |
| pECK8A                                  | FatJ protocadherin          | ENSGALG00000011823 | ENSGALT00000019298 | 14895        | GTAATTCAATATACTGGACATA | 5724     |
| pECK8B                                  |                             |                    |                    |              | TACTGATGATGACTCCGGTATA | 5529     |
| pECK8C                                  |                             |                    |                    |              | GCTCATTAGTGGCAGCCATTCT | 5504     |
| pECK8E                                  |                             |                    |                    |              | AGCAGCAAGTGAAGACAACAAA | 14820    |
| RNAi vector ID                          | Description                 | Ens Gene ID        | Ens Trans ID       | Trans length | Target sequence        | Location |
| pECK9A                                  | Cadherin20, MN-cadherin     | ENSGALG00000012906 | ENSGALT00000021043 | 2879         | GGATCAGCTTTACTTGGTTAAA | 2573     |
| pECK9B                                  |                             |                    |                    |              | CGCCGGAGTTTGCAGGTTCTA  | 1779     |
| pECK9C                                  |                             |                    |                    |              | AGGCGTGCATCATGGACAACAA | 2153     |
| pECK10A                                 | Fat1 protocadherin          | ENSGALG00000013579 | ENSGALT00000022100 | 13689        | CTCTGAAGTAGATGGAAATTA  | 11669    |
| pECK10B                                 |                             |                    |                    |              | TGGTGGTCATATTGGGCAACAA | 11781    |
| pECK10C                                 |                             |                    |                    |              | CTGAAGAATTCATTGGCGATTA | 10874    |
| pECK12A                                 | Calsyntenin3                | ENSGALG00000014674 | ENSGALT00000030492 | 3102         | GCAGCCTCATCTACTGGTTCAA | 1259     |
| pECK12B                                 |                             |                    |                    |              | CTACCAGGTGGAGCCAAGAA   | 2261     |
| pECK12C                                 |                             |                    |                    |              | TTGAAGCTGTGATACTGGATAA | 470      |
| pECK13A                                 | Cadherin2, N-cadherin       | ENSGALG00000015132 | ENSGALT00000024417 | 2739         | TGCCTGATTCACCTCCTAGTA  | 1940     |
| pECK13B                                 |                             |                    |                    |              | TGATGTTCTGATGATGGATGAA | 2237     |
| pECK13C                                 |                             |                    |                    |              | GAGAGCATGCAGTGGATGTA   | 720      |
| pECK14A                                 | Protocadherin8 (Arcadlin)   | ENSGALG00000016944 | ENSGALT00000027388 | 3033         | TGCTTGACCTGGATGCCGAAGA | 797      |
| pECK14B                                 |                             |                    |                    |              | AGTGGCTGTGCCGAGAACAA   | 1421     |
| pECK14C                                 |                             |                    |                    |              | CCAACTCCATCCAGAGCTTCCA | 506      |
| pECK15A                                 | Protocadherin17             | ENSGALG00000016941 | ENSGALT00000027383 | 3441         | GGATCCTACTAGTGGTGAGATA | 1878     |

|                |                                        |                    |                    |              |                         |          |
|----------------|----------------------------------------|--------------------|--------------------|--------------|-------------------------|----------|
| pECK15B        |                                        |                    |                    |              | GTCAGTATCTATCGCCTAGTAA  | 3188     |
| pECK15C        |                                        |                    |                    |              | ACAAGGAGATCCGCACCTATAA  | 2177     |
| pECK38A        | Cadherin1, E-Cadherin                  | ENSGALG00000000608 | ENSGALT00000000855 | 2202         | GGCAAGCCGTTTACCACATCAA  | 782      |
| pECK38B        |                                        |                    |                    |              | TGCACGCCATCAACAGTACATA  | 1217     |
| pECK38C        |                                        |                    |                    |              | AGAAGCAGATACTGAGCATTGT  | 1379     |
| pECK39A        |                                        |                    |                    |              | AGAGCAAATGATCGGAGATTATA | 544      |
| pECK39B        | Cadherin-related neuronal receptor c01 | ENSGALG00000000760 | ENSGALT00000001081 | 2997         | CATCACTGTTGCTAACGCCAAA  | 2522     |
| pECK39C        |                                        |                    |                    |              | GCCTCCAACCTTTATTCTCTCA  | 835      |
| pECK40A        |                                        |                    |                    |              | ACGTGGAGGTGCTGGACGTGAA  | 1004     |
| pECK40B        | Protocadherin beta 15                  | ENSGALG00000001009 | ENSGALT00000001491 | 1429         | GGATTAACCGCTTGCGAGGATTA | 491      |
| pECK40C        |                                        |                    |                    |              | CACGTCAGCTCTTCGATCTTAA  | 866      |
| pECK41A        | Protocadherin1                         | ENSGALG00000002553 | ENSGALT00000004036 | 3675         | CGCAGGTAGTGGTACCACATCAA | 1085     |
| pECK41B        |                                        |                    |                    |              | TCAACGTCATGGATAGGAATGA  | 1772     |
| pECK41C        |                                        |                    |                    |              | GCATCACCATCGTGGACATGAA  | 773      |
| RNAi vector ID | Description                            | Ens Gene ID        | Ens Trans ID       | Trans length | Target sequence         | Location |
| pECK42A        | Protocadherin-LKC gene product         | ENSGALG00000003285 | ENSGALT00000005196 | 3681         | AGCTGTCAGTTGCTGCTATAA   | 2525     |
| pECK42B        |                                        |                    |                    |              | AGATCCGGATCATAGACATTAA  | 2726     |
| pECK42C        |                                        |                    |                    |              | CTTCCAGCTGATGGCCTATGA   | 128      |
| pECK43A        | Fat2 protocadherin                     | ENSGALG00000004320 | ENSGALT00000006879 | 13077        | CCTCTTGATTATCATGCTTTAA  | 6382     |
| pECK43B        |                                        |                    |                    |              | CGCAAGGACTCTTCGCCATTAA  | 3539     |
| pECK43C        |                                        |                    |                    |              | CAGAGAGAGTCATTGCCATTAA  | 7640     |
| pECK44A        | Cadherin23, Otocadherin                | ENSGALG00000004653 | ENSGALT00000007414 | 9954         | CAGGTCTTATCACCACCATGGA  | 3659     |
| pECK44B        |                                        |                    |                    |              | TCGATCTTTCACGGCCTACAA   | 8636     |
| pECK44C        |                                        |                    |                    |              | CACTGATCCTGGAGGCCATTGA  | 3074     |
| pECK45A        | Calsyntenin2                           | ENSGALG00000005310 | ENSGALT00000008513 | 2697         | CGATCGAATTGCAGACCAATTA  | 662      |
| pECK45B        |                                        |                    |                    |              | AGTTTCTGTTGTTACCTTATA   | 1154     |
| pECK45C        |                                        |                    |                    |              | GGCGCAATTTGAAAGTGAAAGA  | 1758     |
| pECK46A        | Cadherin8                              | ENSGALG00000005319 | ENSGALT00000008525 | 2400         | ATGGATACATGGACTCCATTAA  | 28       |
| pECK46B        |                                        |                    |                    |              | TTACTGTACTTCCCTCCATTTA  | 62       |
| pECK46C        |                                        |                    |                    |              | GTGGCACAATATAACGATTGTA  | 1380     |
| pECK47A        | Protocadherin beta 4                   | ENSGALG00000005427 | ENSGALT00000008718 | 1656         | CGGACGAACGAGTGACCTTTAA  | 404      |
| pECK47B        |                                        |                    |                    |              | GGCATTATTGTTACGATCAA    | 863      |
| pECK47C        |                                        |                    |                    |              | TTCTCAGAGTGGTGGCCATTGA  | 782      |
| pECK48A        | Cadherin13, Truncated-cadherin         | ENSGALG00000005483 | ENSGALT00000008808 | 2145         | GGAAGTTGAAGTAACGGATTTA  | 648      |
| pECK48B        |                                        |                    |                    |              | GCTCTGTTGTCAAACCTTTA    | 1278     |
| pECK48C        |                                        |                    |                    |              | GGTGAACATGATGGATCTTTA   | 231      |
| pECK49A        | Protocadherin19                        | ENSGALG00000006822 | ENSGALT00000011030 | 1240         | AGTTCAAAGTCTTGGCGAAAGA  | 537      |
| pECK49B        |                                        |                    |                    |              | AGGTCATCGTGAGGAGAACAA   | 324      |
| pECK49C        |                                        |                    |                    |              | ACAAGGAAATCAGGACCTATAA  | 1068     |
| pECK50A        | Protocadherin11                        | ENSGALG00000006851 | ENSGALT00000011083 | 3012         | CAGACAGAATGGAAAGCAATTA  | 2964     |
| pECK50B        |                                        |                    |                    |              | TACTATAGCTCTTGTGCATTTA  | 2256     |
| pECK50C        |                                        |                    |                    |              | GCCTTGATCTTGAGCCATTCA   | 767      |
| RNAi vector ID | Description                            | Ens Gene ID        | Ens Trans ID       | Trans length | Target sequence         | Location |
| pECK51A        | Cadherin22                             | ENSGALG00000007211 | ENSGALT00000011670 | 2451         | TCATCAAGGTGCAGGACATCAA  | 410      |
| pECK51B        |                                        |                    |                    |              | GGACCATCTTCCCTCATCGATGA | 266      |
| pECK51C        |                                        |                    |                    |              | TGCTTCTGATCCTCACGCTGAA  | 1976     |
| pECK53A        | Unknown gene KIAA0319                  | ENSGALG00000012660 | ENSGALT00000020665 | 3231         | CTAACCTTGTCTTGGAAATTA   | 1487     |
| pECK53B        |                                        |                    |                    |              | GCCACGTATTCAAGTGCAGTAA  | 97       |

|                |                             |                    |                    |              |                        |          |
|----------------|-----------------------------|--------------------|--------------------|--------------|------------------------|----------|
| pECK53C        |                             |                    |                    |              | CCAGAGCAGTGATGACCATGAA | 1665     |
| pECK54A        | Cadherin6B                  | ENSGALG00000012917 | ENSGALT00000021069 | 2376         | CTCACCAATTGGCAGGATTA   | 855      |
| pECK54B        |                             |                    |                    |              | ATGGTTCGATATTTACGTCAA  | 1313     |
| pECK54C        |                             |                    |                    |              | GAGACAACATTGTCAGTTATA  | 1961     |
| pECK55A        | Cadherin10, T2 cadherin     | ENSGALG00000012927 | ENSGALT00000021083 | 2400         | GAGACAACATTGTGAGTTATA  | 1961     |
| pECK55B        |                             |                    |                    |              | TGGCTTTAGTCGACATGAAATA | 1665     |
| pECK55C        |                             |                    |                    |              | ATCCGGACTGCTTTGCCAAATA | 649      |
| pECK56A        | Cadherin12, Brain cadherin  | ENSGALG00000012941 | ENSGALT00000021107 | 2391         | TCATCAAAGTGCAGGACATTAA | 440      |
| pECK56B        |                             |                    |                    |              | GTAATTTCTCCAGTGGTAATA  | 1698     |
| pECK56C        |                             |                    |                    |              | GATACTTCATCGATTGGAAGAA | 1262     |
| pECK57A        | Cadherin18 (Cdh14)          | ENSGALG00000012942 | ENSGALT00000021109 | 2379         | TGCTAATACTGGAACCATTA   | 1308     |
| pECK57B        |                             |                    |                    |              | CCGTTGTCAATCAAGCCAAAGA | 698      |
| pECK57C        |                             |                    |                    |              | GACCATCACTCAACTGACAAA  | 1527     |
| pECK58A        | Protocadherin7              | ENSGALG00000014349 | ENSGALT00000023178 | 3267         | GAGACAGTATTTCACTCTGAAA | 3076     |
| pECK58B        |                             |                    |                    |              | CTTTGTCTCTATTGATCCTATA | 3171     |
| pECK58C        |                             |                    |                    |              | AGCCACAGAACAAGCGCAAGTA | 1166     |
| pECK59A        | Protocadherin9              | ENSGALG00000016908 | ENSGALT00000027329 | 3057         | CGTGGTCTATACTTAACAATA  | 1450     |
| pECK59B        |                             |                    |                    |              | ACAAAGGTTTGTTCGGATTGA  | 2165     |
| pECK59C        |                             |                    |                    |              | CCAACAACCTTTAAGCCTAACA | 2731     |
| pECK60A        | Protocadherin13             | ENSGALG00000016934 | ENSGALT00000027374 | 2754         | CAATCCTTCTTAGACATAAA   | 2084     |
| pECK60B        |                             |                    |                    |              | GCTCCTATGTTCTGTGGATTGA | 2015     |
| pECK60C        |                             |                    |                    |              | GACCTTGGATCCAATGCACAAA | 940      |
| pECK61A        | FRAS1-related ECM protein 2 | ENSGALG00000017041 | ENSGALT00000027534 | 9282         | AGCTCCTATTAGCAGGCAATA  | 4208     |
| pECK61B        |                             |                    |                    |              | TGAAGACAGTGGAGGCAATA   | 5010     |
| pECK61C        |                             |                    |                    |              | GGAGATGAATCAACTGTCTTA  | 5392     |
| RNAi vector ID | Description                 | Ens Gene ID        | Ens Trans ID       | Trans length | Target sequence        | Location |
| pECK62A        | Fat3 protocadherin          | ENSGALG00000017229 | ENSGALT00000027846 | 3291         | CAGCCGGTCTCGATGGCAAATA | 2932     |
| pECK62B        |                             |                    |                    |              | CTTCATAGTACTGTCATACA   | 2576     |
| pECK62C        |                             |                    |                    |              | GCCTGCACATCATCAGCATTCA | 575      |
| pECK64A        | Protocadherin gamma A11     | ENSGALG00000021472 | ENSGALT00000004187 | 2832         | CCAATCCATCTCCACCTATGA  | 503      |
| pECK64B        |                             |                    |                    |              | TAGCAATAATGCACCTGGTAAA | 861      |
| pECK64C        |                             |                    |                    |              | ATTGCAAGTACAAGCAGAATA  | 2273     |
| Tead4A         | Tead4                       | ENSGALG00000014342 | NM_204771          | 1465         | CGTTCCTCGTTTACTCCTTTAA | 59       |
| Tead4B         |                             |                    |                    |              | TCTACAGCCTTCACTGCCATTA | 782      |
| Tead4C         |                             |                    |                    |              | GCTCCAAACTTTGGATGTTAGA | 637      |
| Yap1A          | Yap1                        | ENSGALG00000017188 | ENSGALT00000027774 | 1032         | CAGCCAAAGTGTCCAGTGAAA  | 384      |
| Yap1B          |                             |                    |                    |              | CTGGACAGATACTTCTTAA    | 230      |
| Yap1C          |                             |                    |                    |              | GCGGACTTAGCATGAGCAGTTA | 716      |
